# Supplementary material
Source: HighWire-hosted journal article supplement (https://bmjopen.bmj.com/content/11/8/e052629)
Supplement: inline-supplementary-material-3 [file inline-supplementary-material-3.pdf]

Supp Table 1 Patient saturation table and interview characteristics

|                                      |                                                                                                                | Value                      |
|--------------------------------------|----------------------------------------------------------------------------------------------------------------|----------------------------|
| <b>Patient Interviews</b>            |                                                                                                                |                            |
| Number invited/Number participating  |                                                                                                                | 41/22                      |
| Reasons for non-participation        | Did not meet eligibility criteria, did not want to participate (transport issues, did not want to do research) |                            |
|                                      |                                                                                                                | Range 24-84                |
| Duration of patient interviews (min) |                                                                                                                | Mean 50 mins               |
| <b>Patient Saturation Data</b>       |                                                                                                                |                            |
| No of codes generated                |                                                                                                                | 110                        |
| Point of data saturation             |                                                                                                                | 15 <sup>th</sup> interview |
| Note n=17                            |                                                                                                                |                            |

|                                     |                                                                             | 1 | 2 | 3 | 4 | 5 | 6 | 7 | 8 | 9 | 10 | 11 | 12 | 13 | 14 | 15 | 16 | 17 | 18 | 19 | 20 | 21 | 22 |
|-------------------------------------|-----------------------------------------------------------------------------|---|---|---|---|---|---|---|---|---|----|----|----|----|----|----|----|----|----|----|----|----|----|
| <b>1 Innovation Characteristics</b> |                                                                             |   |   |   |   |   |   |   |   |   |    |    |    |    |    |    |    |    |    |    |    |    |    |
| 1A Innovation Source                |                                                                             |   |   |   |   |   |   |   |   |   |    |    | x  |    |    |    |    |    | x  |    |    |    |    |
| 1B Evidence strength and quality    |                                                                             | / | / | / | / | / | / | / | / | / | /  | /  | /  | /  | /  | /  | /  | /  | /  | /  | /  | /  | /  |
| 1C Relative Advantage               | Perception of advantage                                                     | x | x |   | x | x | x | x |   |   | x  | x  | x  |    | x  | x  | x  |    | x  |    | x  | x  |    |
|                                     | Intractable problems<br>Potential to cause anxiety                          |   |   |   |   |   |   |   | x |   | x  |    |    | x  | x  | x  |    |    |    | x  | x  | x  |    |
| 1D Adaptability                     | Adaptability of intervention                                                |   |   |   |   |   |   |   |   |   |    |    | x  |    |    |    |    |    | x  |    |    |    |    |
|                                     | Use within research<br>Importance of choices in how<br>and what is answered | x | x | x | x |   |   | x | x |   |    | x  | x  | x  |    | x  | x  |    | x  |    |    | x  |    |
| 1E Trialability                     |                                                                             | / | / | / | / | / | / | / | / | / | /  | /  | /  | /  | /  | /  | /  | /  | /  | /  | /  | /  | /  |
| 1F Complexity                       |                                                                             |   |   |   |   |   |   | x |   |   |    |    |    |    |    |    |    |    | x  |    |    |    |    |
| 1G Design and Packaging             | Frequency                                                                   | x | x |   | x |   | x | x |   | x | x  | x  |    | x  | x  | x  | x  |    |    | x  |    | x  | x  |
|                                     | Length                                                                      | x | x | x | x |   | x | x |   | x | x  | x  | x  | x  | x  | x  | x  |    | x  | x  | x  |    | x  |
|                                     | Language/Readability<br>Mode                                                | x | x | x | x | x |   | x | x | x | x  | x  | x  |    | x  | x  | x  | x  |    |    | x  | x  | x  |

Supp Table 1 Patient saturation table and interview characteristics

|                                     |                              | 1 | 2 | 3 | 4 | 5 | 6 | 7 | 8 | 9 | 10 | 11 | 12 | 13 | 14 | 15 | 16 | 17 | 18 | 19 | 20 | 21 | 22 |
|-------------------------------------|------------------------------|---|---|---|---|---|---|---|---|---|----|----|----|----|----|----|----|----|----|----|----|----|----|
|                                     | Setting                      | x |   | x | x | x |   | x | x |   | x  | x  | x  | x  |    | x  | x  | x  |    | x  | x  | x  | x  |
|                                     | Timing                       | x | x |   | x | x | x |   | x | x | x  |    |    | x  | x  | x  |    | x  | x  | x  |    | x  | x  |
|                                     | Outcomes that matter         | x | x |   | x | x | x |   |   | x |    |    | x  | x  | x  |    |    |    | x  | x  |    | x  | x  |
|                                     | Current Measures             |   |   |   | x | x | x | x |   |   | x  | x  | x  | x  |    |    | x  | x  |    |    | x  | x  | x  |
|                                     | Safety Alerts                | x |   |   |   |   |   |   |   |   |    |    |    |    |    |    |    |    | x  |    |    |    | x  |
|                                     | Self-help information        |   | x |   |   |   |   |   | x |   |    |    | x  | x  |    |    | x  |    |    |    |    |    | x  |
|                                     | Computer Adaptive Technology |   |   |   |   |   |   |   |   |   | x  | x  |    | x  |    | x  | x  |    | x  | x  |    |    |    |
|                                     | Review and Feedback          | x | x |   | x |   | x | x | x | x | /  | /  | x  | x  | /  | x  | x  | /  | x  | x  | x  |    | x  |
| Sensitivity to change               | /                            | / | / | / | / | / | / | / | / | / | /  | /  | /  | /  | /  | /  | /  | /  | /  | /  | /  | /  | /  |
| IH Cost                             |                              |   |   |   |   |   |   |   |   |   |    |    |    |    |    |    |    |    | x  |    |    |    |    |
| <b>2 Outer Setting</b>              |                              |   |   |   |   |   |   |   |   |   |    |    |    |    |    |    |    |    |    |    |    |    |    |
| 2A Needs and resources              | Identification               |   | x | x | x |   | x | x | x |   |    | x  | x  | x  | x  |    |    | x  | x  | x  | x  | x  | x  |
|                                     | Barriers                     | x | x | x | x | x | x | x | x | x | x  | x  | x  | x  | x  | x  | x  | x  | x  | x  | x  | x  | x  |
|                                     | Facilitators                 | x | x | x | x |   | x |   |   | x | x  | x  | x  | x  |    |    |    | x  | x  | x  |    | x  |    |
| 2B Cosmopolitanism                  |                              |   |   | x |   |   |   | x |   |   | x  |    |    |    | x  |    |    |    |    | x  |    |    |    |
| 2C Peer Pressure                    |                              | / | / | / | / | / | / | / | / | / | /  | /  | /  | /  | /  | /  | /  | /  | /  | /  | /  | /  | /  |
| 2D External policies and incentives |                              | / | / | / | / | / | / | / | / | / | /  | /  | /  | /  | /  | /  | /  | /  | /  | /  | /  | /  | /  |
| <b>3 Inner Setting</b>              |                              |   |   |   |   |   |   |   |   |   |    |    |    |    |    |    |    |    |    |    |    |    |    |
| 3A Structural Characteristics       |                              |   |   |   |   |   |   |   |   |   |    |    |    |    |    | x  |    |    |    |    |    |    |    |
| 3B Networks and Communications      | Nature and Quality           |   | x | x | x | x | x | x | x | x | x  | x  | x  |    | x  | x  |    | x  | x  | x  | x  | x  | x  |
|                                     | Shared Decision Making       | x | x | x |   |   |   |   |   |   | x  | x  | x  | x  | x  | x  |    | x  |    | x  | x  |    | x  |
| 3C Culture                          |                              |   |   |   |   |   |   |   |   |   | x  |    |    | x  | x  | x  |    |    |    |    |    | x  |    |
| 3D Implementation Climate           | Tension for change           |   | x | x |   |   |   |   | x |   |    | x  | x  | x  | x  |    |    | x  | x  | x  | x  |    | x  |
|                                     | Compatibility                |   |   |   |   |   |   | x |   |   |    | x  | x  |    |    |    |    |    |    |    |    | x  | x  |
|                                     | Relative Priority            | x |   |   | x |   |   |   |   |   | x  |    |    |    |    |    |    |    |    |    |    | x  | x  |
|                                     | Organisational Incentives    | / | / | / | / | / | / | / | / | / | /  | /  | /  | /  | /  | /  | /  | /  | /  | /  | /  | /  | /  |

Supp Table 1 Patient saturation table and interview characteristics

|                                             |                                                                  | 1 | 2 | 3 | 4 | 5 | 6 | 7 | 8 | 9 | 10 | 11 | 12 | 13 | 14 | 15 | 16 | 17 | 18 | 19 | 20 | 21 | 22 |
|---------------------------------------------|------------------------------------------------------------------|---|---|---|---|---|---|---|---|---|----|----|----|----|----|----|----|----|----|----|----|----|----|
|                                             | Goals and Feedback<br>Learning Climate                           | / | / | / | / | / | / | / | / | / | /  | /  | /  | /  | /  | /  | /  | /  | /  | /  | /  | /  | /  |
| 3E Readiness<br>for<br>Implementation       | Leadership Engagement                                            | / | / | / | / | / | / | / | / | / | /  | /  | /  | /  | /  | /  | /  | /  | /  | /  | /  | /  | /  |
|                                             | Available Resources                                              |   | x |   | x |   |   |   |   |   |    |    |    |    |    | x  |    | x  |    |    |    | x  |    |
|                                             | Access to knowledge and info                                     |   | x |   |   | x | x |   |   |   |    |    | x  |    | x  | x  | x  |    |    |    |    | x  | x  |
| <b>4 Characteristics of Individuals</b>     |                                                                  |   |   |   |   |   |   |   |   |   |    |    |    |    |    |    |    |    |    |    |    |    |    |
| Knowledge and beliefs                       |                                                                  | x | x | x | x |   |   | x | x | x |    | x  |    | x  | x  | x  | x  | x  | x  | x  | x  | x  |    |
| Self-efficacy                               | Ability to self-complete                                         | x | x | x |   | x | x | x | x | x | x  | x  | x  | x  | x  | x  | x  | x  |    | x  |    | x  |    |
|                                             | Patient as an Expert                                             |   |   | x |   |   |   | x |   |   |    | x  | x  | x  | x  |    |    |    |    | x  |    |    |    |
|                                             | PROMs v PREMs                                                    |   | x |   | x | x |   | x |   |   |    |    |    |    |    |    |    |    |    |    | x  |    |    |
| Individual<br>stage of change               | Previous experience of PROMs<br>usage                            | x |   |   | x | x | x |   | x | x | x  | x  | x  | x  | x  | x  | x  | x  | x  | x  | x  | x  | x  |
| Individual identification with organisation |                                                                  | x | x |   | x | x | x | x | x | x | x  | x  | x  | x  | x  |    | x  |    |    | x  | x  | x  | x  |
| Other personal<br>attributes                | Multidimensionality of ESKD:<br>Symptomology<br>Life on Dialysis | x | x | x | x | x | x | x | x | x | x  | x  | x  | x  | x  | x  | x  | x  | x  | x  | x  | x  | x  |
|                                             |                                                                  | x | x | x | x | x | x | x | x | x | x  | x  | x  | x  | x  | x  | x  | x  | x  | x  | x  | x  | x  |
| <b>5 Process</b>                            |                                                                  |   |   |   |   |   |   |   |   |   |    |    |    |    |    |    |    |    |    |    |    |    |    |
| 5A Planning                                 |                                                                  | / | / | / | / | / | / | / | / | / | /  | /  | /  | /  | /  | /  | /  | /  | /  | /  | /  | /  | /  |
| 5B Engaging                                 | Opinion Leaders                                                  | / | / | / | / | / | / | / | / | / | /  | /  | /  | /  | /  | /  | /  | /  | /  | /  | /  | /  | /  |
|                                             | Formally appointed leaders                                       |   |   |   |   | x |   | x |   |   |    |    |    |    |    |    |    |    |    |    |    |    |    |
|                                             | Champions                                                        |   |   |   |   | x |   |   |   |   |    |    | x  | x  |    |    |    |    |    |    |    |    |    |
|                                             | External Change Agents                                           | / | / | / | / | / |   | / | / | / | /  | /  | /  | /  | /  | /  | /  | /  | /  | /  | /  | /  | /  |
|                                             | Key Stakeholders                                                 | / | / | / | / | / |   | / | / | / | /  | /  | /  | /  | /  | /  | /  | /  | /  | /  | /  | /  | /  |
|                                             | Innovation Participants                                          |   |   |   | x |   |   |   |   |   |    |    | x  |    |    |    |    |    |    |    |    |    |    |
|                                             | Role of Carers                                                   | x |   | x | x |   | x | x |   | x |    |    | x  |    |    |    | x  |    |    |    |    |    |    |
| 5C Executing                                |                                                                  | / | / | / | / | / | / | / | / | / | /  | /  | /  | /  | /  | /  | /  | /  | /  | /  | /  | /  | /  |
| 5D Reflecting and Evaluating                |                                                                  | / | / | / | / | / | / | / | / | / | /  | /  | /  | /  | /  | /  | /  | /  | /  | /  | /  | /  | /  |

Supp Table 1 Patient saturation table and interview characteristics

|                                        |   |
|----------------------------------------|---|
| First time data coded to node in NVIVO | x |
| Nothing coded to node in NVIVO         | / |
| Nothing coded to node in NVIVO         | / |
